# Supplementary material for: Molecular Characterization of a DNA Polymerase from Thermus thermophilus MAT72 Phage vB_Tt72: A Novel Type-A Family Enzyme with Strong Proofreading Activity
Source: MDPI journal article supplement (doi:10.3390/ijms23147945), 2022-07-19
Supplement: s1 [file s1]

## Supplementary Materials

**Table S1.** Sequences of primers and oligonucleotides used in this study.

| Primer name                                                 | Oligonucleotide sequence (5'→3')              | T <sub>m</sub> |
|-------------------------------------------------------------|-----------------------------------------------|----------------|
| <b>Cloning of <i>polTt72</i> gene to expression vectors</b> |                                               |                |
| polTt72-NdeI-F                                              | CGAATTCCATATGGACAAAGACCTTTTGGGATAC            | 62.0 °C        |
| polTt72-BamHI-R                                             | CGCGGATCCTTAAAGAACATTATTAAAACATTCTTCAC        | 61.2 °C        |
| polTt72-Sall-R                                              | CGCGTCGACAAGAACATTATTAAAACATTCTTCAC           | 61.0 °C        |
| <b>Cloning of <i>polTt72</i> gene to pHSG576</b>            |                                               |                |
| polTt72-PstI-F                                              | CGATTCCTGCAGCTATGGACAAAGACCTTTTGGGATAC        | 66.6 °C        |
| polTt72-BamHI-R                                             | CGCGGATCCTTAAAGAACATTATTAAAACATTCTTCAC        | 61.2 °C        |
| <b>Cloning of <i>polTth</i> gene to pHSG576</b>             |                                               |                |
| polTth-Sall-F                                               | CGATTCGTCGACATATGGAGGCGATGCTTCCGCTCTTTGAACCCA | 71.8 °C        |
| polTth-EcoRI-R                                              | GCGGAATTCTCAACCCTTGCGGAAAGCCAGTCCTCCCCCATCC   | 74.8 °C        |
| <b>Cloning of <i>polTaq</i> gene to pHSG576</b>             |                                               |                |
| polTaq-SalI-F                                               | CGATTCGTCGACATATGAGGGGGATGCTGCCCCTCTTTGAG     | 71.5 °C        |
| polTaq-EcoRI-R                                              | GCGGAATTCTCACTCCTTGCGGAGAGCCAGTCCTC           | 71.3 °C        |
| <b>Terminal transferase activity assay</b>                  |                                               |                |
| polTt72-Cy3                                                 | Cy3-TGGCTGCTTCTAAGCCAACATCCT                  | 57.4 °C        |
| polTt72-blunt                                               | AGGATGTTGGCTTAGAAGCAGCCA                      | 57.4 °C        |
| <b>Microscale thermophoresis</b>                            |                                               |                |
| polTt72-Cy5                                                 | Cy5-TGGCTGCTTCTAAGCCAACATCCT                  | 57.4 °C        |
| polTt72-long                                                | CTAGTGAGGATGTTGGCTTAGAAGCAGCCA                | 63.0 °C        |

**Table S2.** Sequences of primers used in site-directed mutagenesis of *polTt72* gene.

| Primer name: | Oligonucleotide sequences (5'→3'):              | Codon change: |
|--------------|-------------------------------------------------|---------------|
| D15A_F       | ATACAAAAAGATTGTTGGGATAGCTATAGAAACATGGGACGGTAAAC | GAT → GCT     |
| D15A_R       | GTTTACCGTCCCATGTTTCTATAGCTATCCCAACAATCTTTTGTAT  | GAT → GCT     |
| E17A_F       | GATTGTTGGGATAGATATAGCAACATGGGACGGTAAACGAG       | GAA → GCA     |
| E17A_R       | CTCGTTTACCGTCCCATGTTGCTATATCTATCCCAACAATC       | GAA → GCA     |
| L27A_F       | GGGACGGTAAACGAGGAGGATCAGCTGATCCTTATTATG         | CTT → GCT     |
| L27A_R       | CATAATAAGGATCAGCTGATCCTCCTCGTTTACCGTCCC         | CTT → GCT     |
| D78A_F       | GTTGGGCACAACCTAAAGTTTGCCCTTAAGTTCTTTATATGAACA   | GAC → GCC     |
| D78A_R       | TGTTTCATATAAAAGAACTTAAGGGCAAACTTTAGGTTGTGCCCAAC | GAC → GCC     |
| Y180A_F      | GTGAAGCACAAAAAGAGGCCGCAATCAACGATGTTAAG          | TAC → GCC     |
| Y180A_R      | CTTAACATCGTTGATTGCGGCCTCTTTTGTGCTTCAC           | TAC → GCC     |

|         |                                                   |           |
|---------|---------------------------------------------------|-----------|
| D184A_F | CACAAAAAGAGTACGCAATCAACGCTGTAAAGTACTTAAAAGATTTAGC | GAT → GCT |
| D184A_R | GCTAAATCTTTTAAGTACTTAACAGCGTTGATTGCGTACTCTTTTTGTG | GAT → GCT |
| D384A_F | AGGCTATGTTCTGTATTGCTGCTTATTCTCAAGTAG              | GAT → GCT |
| D384A_R | CTACTTGAGAATAAGCAGCAAATACAGGAACATAGCCT            | GAT → GCT |
| E389A_F | GCTGATTATTCTCAAGTAGCATTAGAATTCTTGCC               | GAA → GCA |
| E389A_R | GGCAAGAATTCTTAATGCTACTTGAGAATAATCAGC              | GAA → GCA |
| D615A_F | GGTATATGACATTGACAGTTCACGCTAGTATCTTTTTTGAG         | GAT → GCT |
| D615A_R | CTCAAAAAAGATACTAGCGTGAAGTGTCAATGTCATATACC         | GAT → GCT |
| S616A_F | GGTATATGACATTGACAGTTCACGATGCTATCTTTTTTGAG         | AGT → GCT |
| S616A_R | CTCAAAAAAGATAGCATCGTGAAGTGTCAATGTCATATACC         | AGT → GCT |

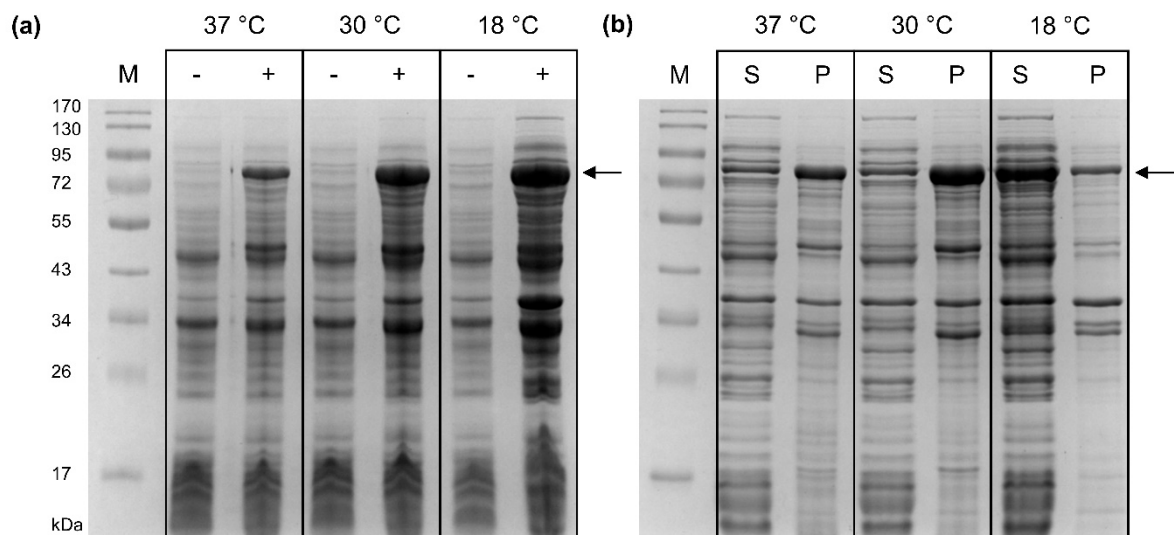

**Figure S1.** (a) Effect of temperature on overproduction of the Tt72 pol in *E. coli* BL21(DE3)[pRARE][pET15b\_polTt72]; (b) Solubility analysis of recombinant protein. Proteins were separated in 10% SDS-polyacrylamide gel electrophoresis and stained with Coomassie Brilliant Blue. An arrow indicates the position of the His-tagged recombinant Tt72 pol (82,650 Da); lane (-) before induction; (+) after induction with IPTG (1 mM); S, soluble fraction; P, insoluble fraction; M, protein molecular mass markers (PageRuler™ Prestained Protein Ladder, Thermo Scientific).

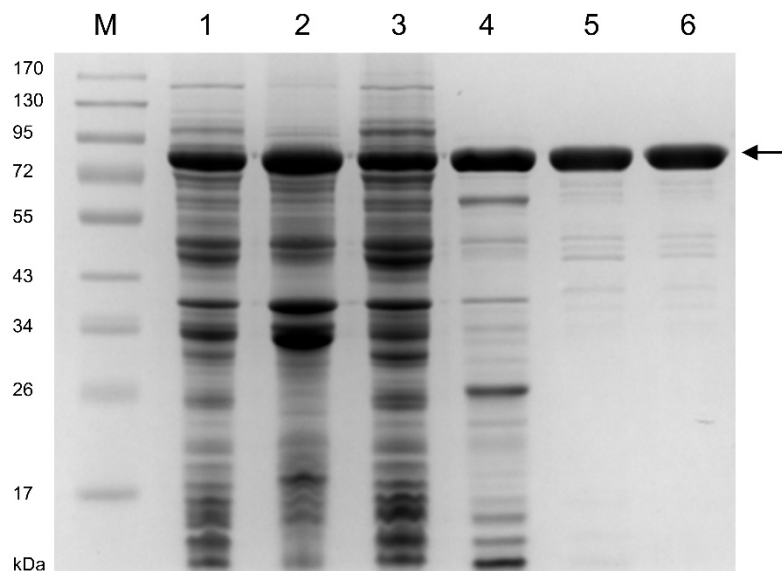

**Figure S2.** Successive steps in purification of the Tt72 pol. Proteins were separated in 10% SDS-polyacrylamide gel electrophoresis and stained with Coomassie Brilliant Blue. An arrow indicates the position of the His-tagged recombinant Tt72 pol (82.7 kDa); Lane 1, lysate from *E. coli* BL21(DE3)[pRARE, pET15\_polTt72]; 2, the fraction of insoluble proteins; 3, the fraction of soluble proteins; 4, clear cell-lysate after centrifugation and heat-treatment (60 °C, 20 min); (5) HiTrap™ TALON affinity chromatography fraction; (6) HiTrap™ Heparin HP affinity chromatography fraction; (M) protein molecular mass markers (PageRuler™ Prestained Protein Ladder, Thermo Scientific).

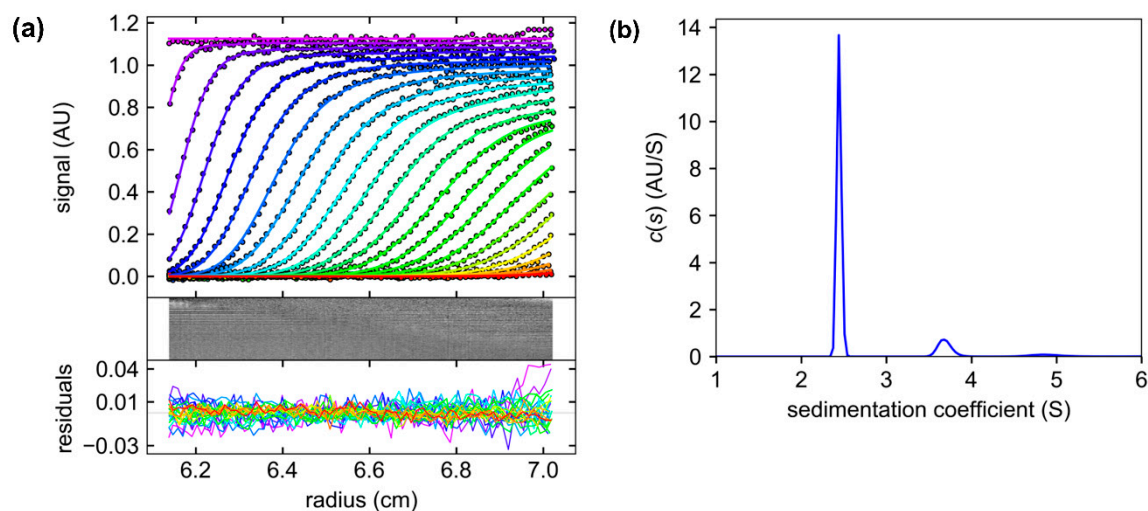

**Figure S3.** Determination of the Tt72 pol oligomeric state by analytical centrifugation. (a) Sedimentation-velocity data (dots) collected for Tt72 pol samples at concentration 1.0 mg/mL. Sedimentation velocity data were overlaid with the best-fit curves (lines) obtained from sedimentation coefficient distribution analysis. For clarity, only every third scan and every third data point is included. Below, the residuals of the experimental fits. (b) Sedimentation coefficient distributions [c(s)] of Tt72 pol.

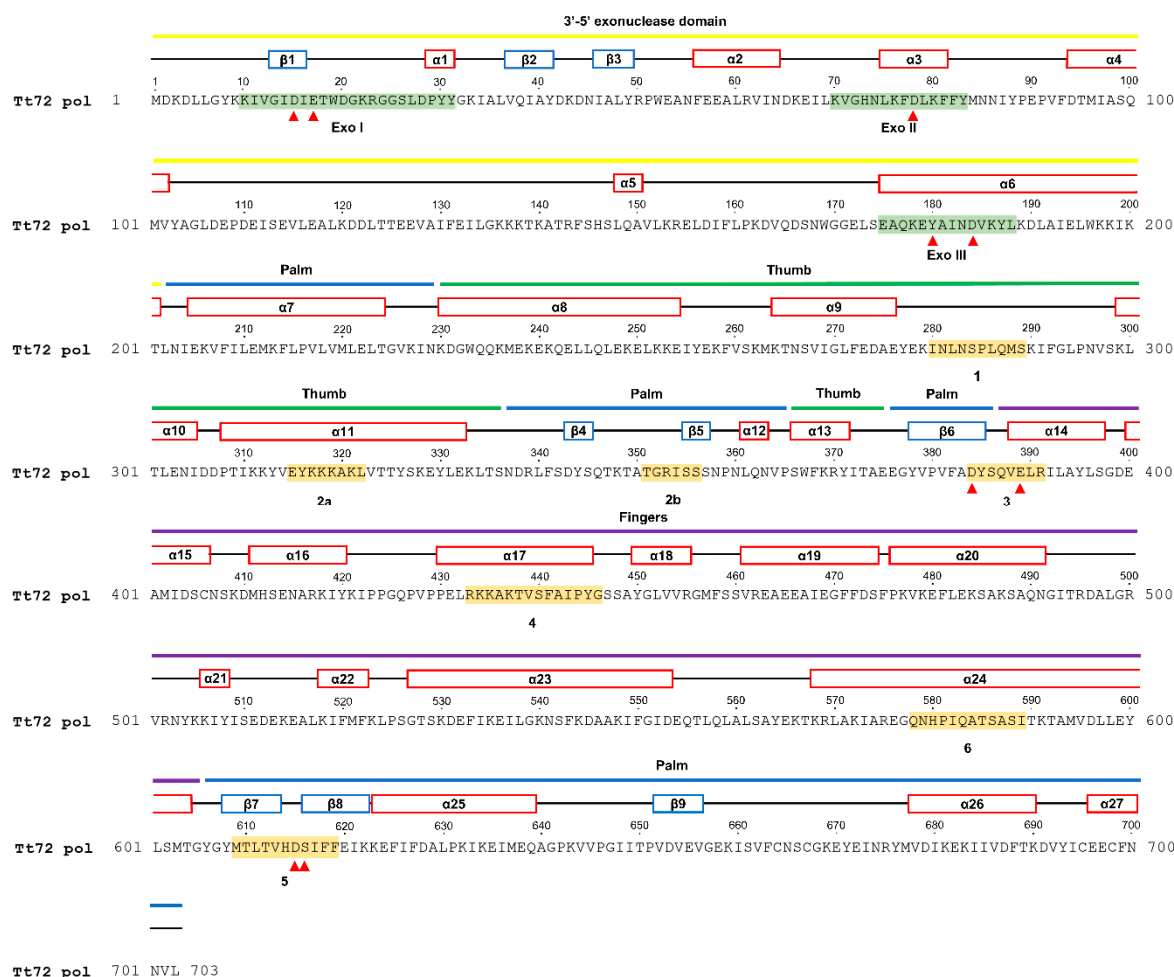

**Figure S4.** Secondary structure prediction of Tt72 pol. The amino acid sequence of Tt72 pol was subjected to secondary structure meta-server analysis [124], which was plotted as a line for coil, blue boxes for alpha-helices, and yellow boxes for beta-sheets. A colored line above the structural elements indicates the position of domains and subdomains. The yellow line indicates the 3'-5' exo domain. Blue, green, and purple lines within the nucleotidyltransferase domain indicate palm, thumb, and fingers subdomains. The highly conserved motifs within the amino-acid sequence in both domains are indicated by colored unframed green and yellow boxes. The red triangle indicates the catalytic residues within the 3'-5' exo and nucleotidyltransferase domain, which importance was tested using site-directed mutagenesis.

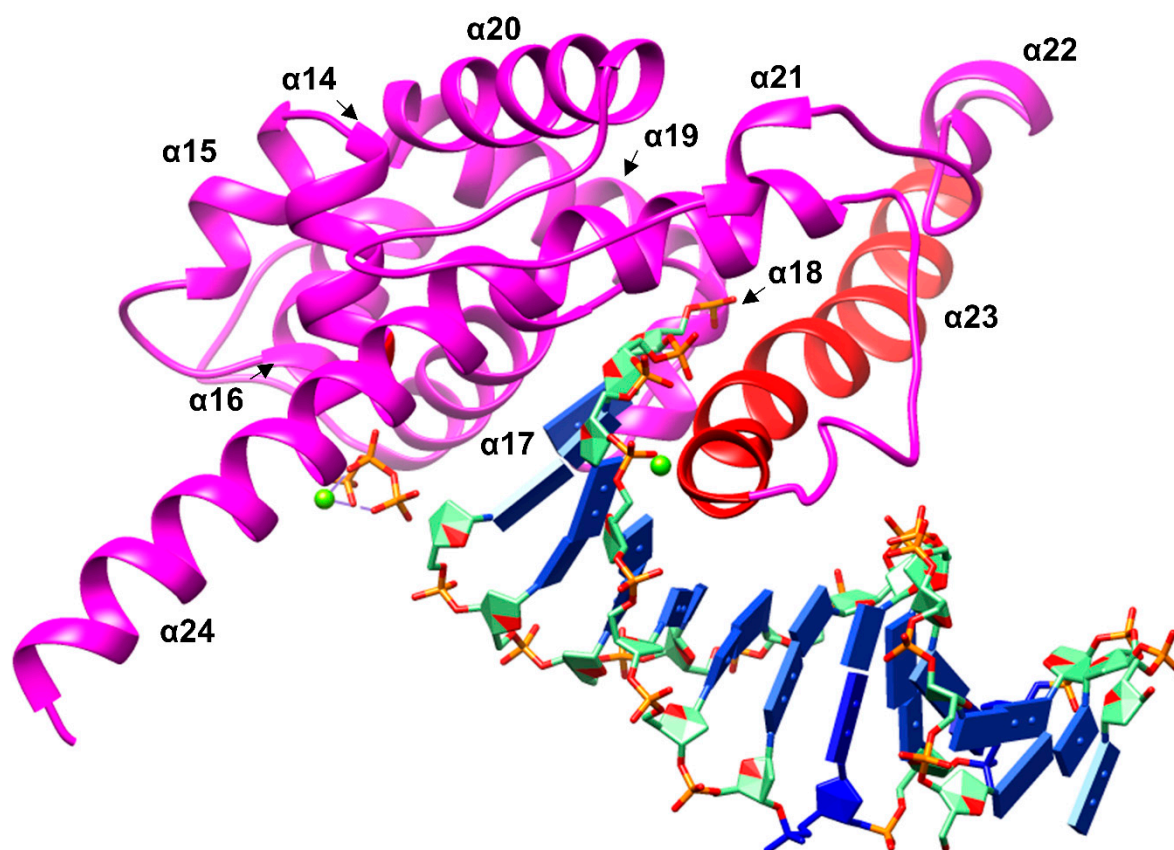

**Figure S5.** Structural model of subdomain fingers (387-605 aa) of Tt72 DNA polymerase. The unique secondary-structure element  $\alpha$ -helix ( $\alpha23$ , 527-553 aa) is shown in red.
